# Supplementary material
Source: Frontiers journal article supplement (https://www.frontiersin.org/articles/367945)
Supplement: Presentation_1.PDF [file Presentation_1.PDF]

**SUPPLEMENTARY MATERIAL for:**  
**Modelling active cell movement with the Potts model**

Nara Guisoni,<sup>1</sup> Karina I. Mazzitello,<sup>2</sup> and Luis Diambra<sup>3</sup>

<sup>1</sup>*INIFTA, Universidad Nacional de La Plata - CONICET*

<sup>2</sup>*Instituto de Investigaciones Científicas y Tecnológicas en Electrónica,  
Universidad Nacional de Mar del Plata - CONICET*

<sup>3</sup>*Centro Regional de Estudios Genómicos,  
Universidad Nacional de La Plata - CONICET.*

## MOVIES LEGENDS

**Supp. movie 1:** Animated movie of *in-silico* cells in a low density culture medium. The driving force angle  $\Theta$  is updated according to Eq. (3). Parameters used:  $\rho = 0.2$ ,  $\tau = 10$  MCS and  $\phi = 0.95$ . Simulation carried on a lattice of  $256 \times 256$  sites during 10000 MCS and snapshots are taken each 10 MCS.

**Supp. movie 2:** Animated movie of *in-silico* cells in a high density culture medium. The driving force angle  $\Theta$  is updated according to Eq. (3). Parameters used:  $\rho = 0.9$ ,  $\tau = 10$  MCS and  $\phi = 0.95$ . Simulation carried on a lattice of  $256 \times 256$  sites during 10000 MCS and snapshots are taken each 10 MCS.

# SUPPLEMENTARY FIGURES

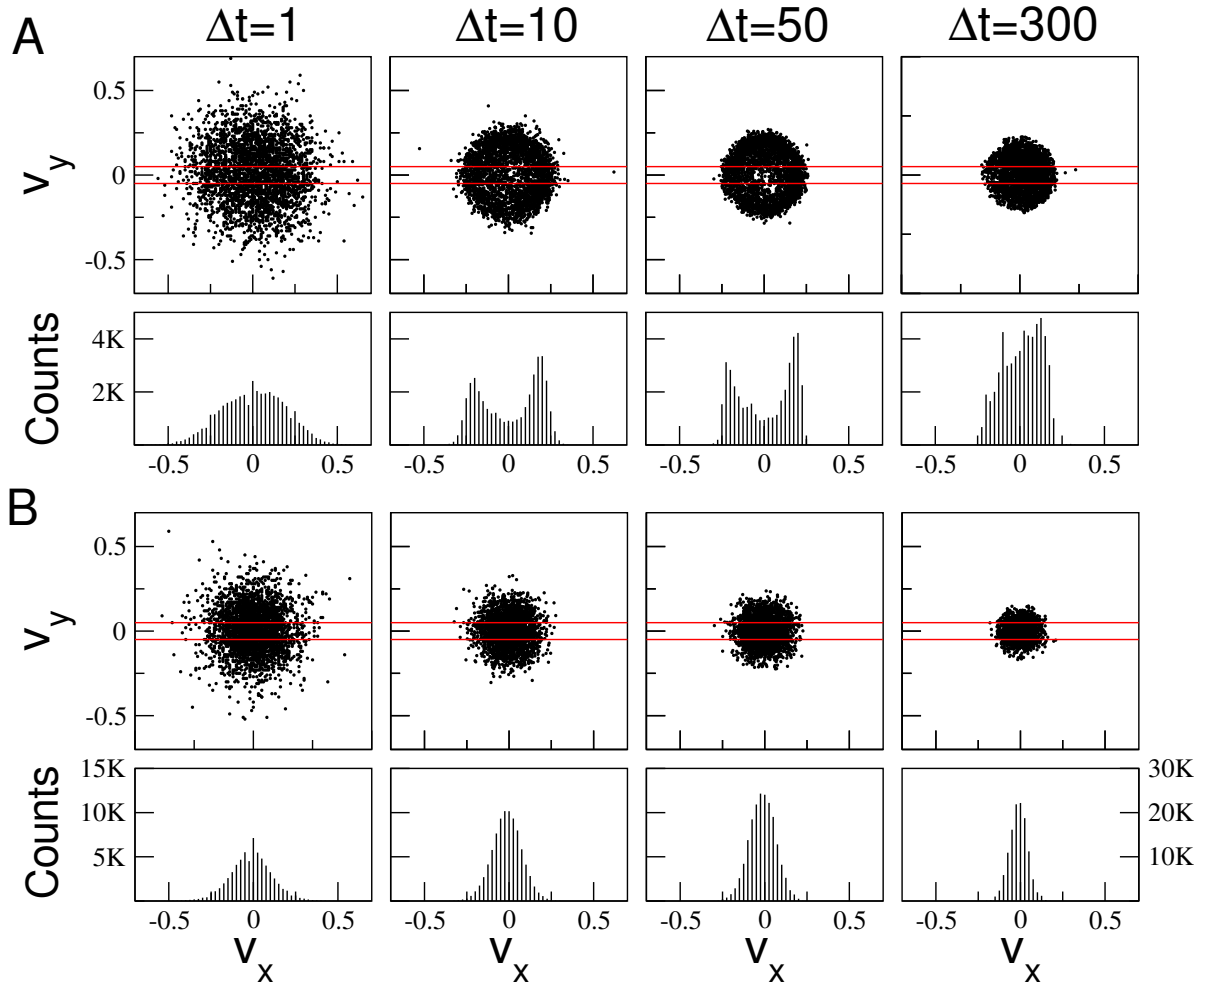

Supp. Fig. 1. Cell velocities  $v_x$  vs  $v_y$  calculated for different values of the time interval  $\Delta t$  (upper panels). Histogram of the cell velocity component  $v_x$  computed over the  $v_y$  window indicated by red bars (lower panels). Two different values of densities were used:  $\rho = 0.2$  (A) and  $\rho = 0.9$  (B). Parameters used:  $\tau = 50$  MCS and  $\phi = 0.95$ .

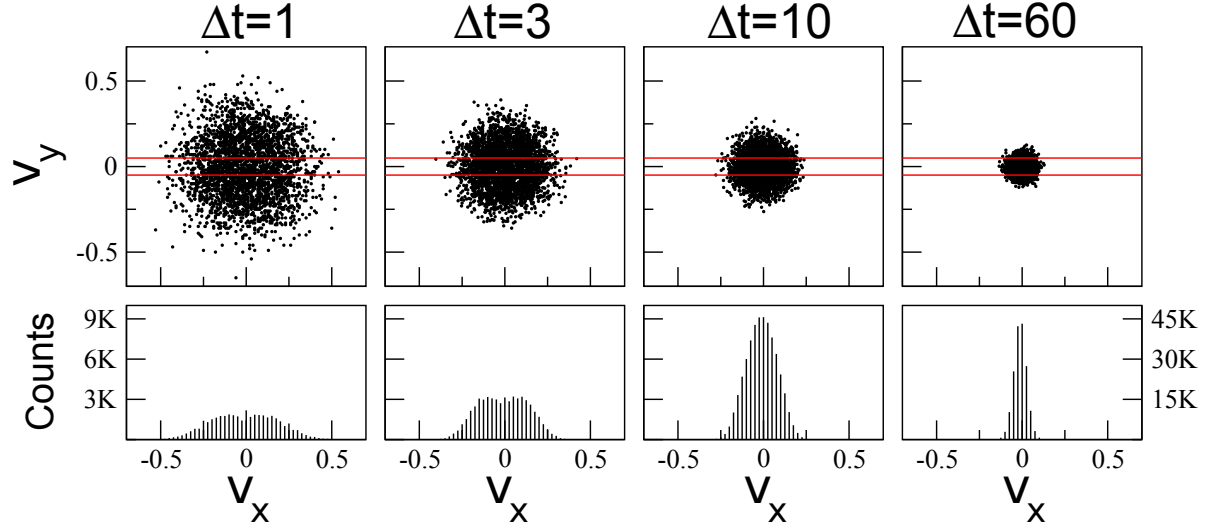

Supp. Fig. 2. Cell velocities  $v_x$  vs  $v_y$  calculated for different values of the time interval  $\Delta t$  (upper panels). Histogram of the cell velocity component  $v_x$  computed over the  $v_y$  window indicated by red bars (lower panels). Parameters used:  $\rho = 0.2$ ,  $\tau = 1$  MCS and  $\phi = 0.95$ .

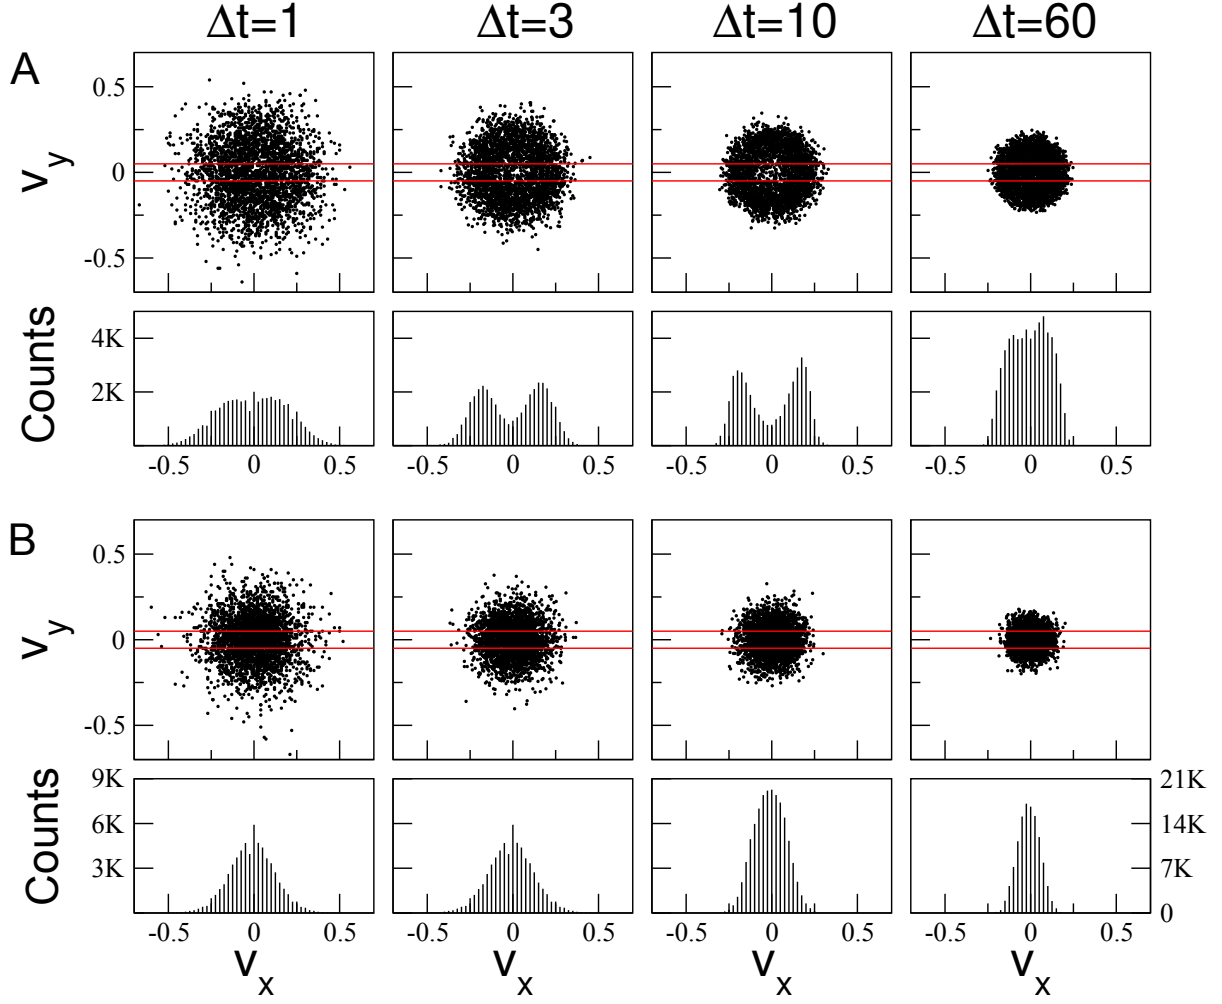

Supp. Fig. 3. Cell velocities  $v_x$  vs  $v_y$  calculated for different values of the time interval  $\Delta t$  (upper panels). Histogram of the cell velocity component  $v_x$  computed over the  $v_y$  window indicated by red bars (lower panels). Two different values of densities were used:  $\rho = 0.2$  (A) and  $\rho = 0.9$  (B). Parameters used:  $\tau = 10$  MCS and  $\phi = 0.99$ .

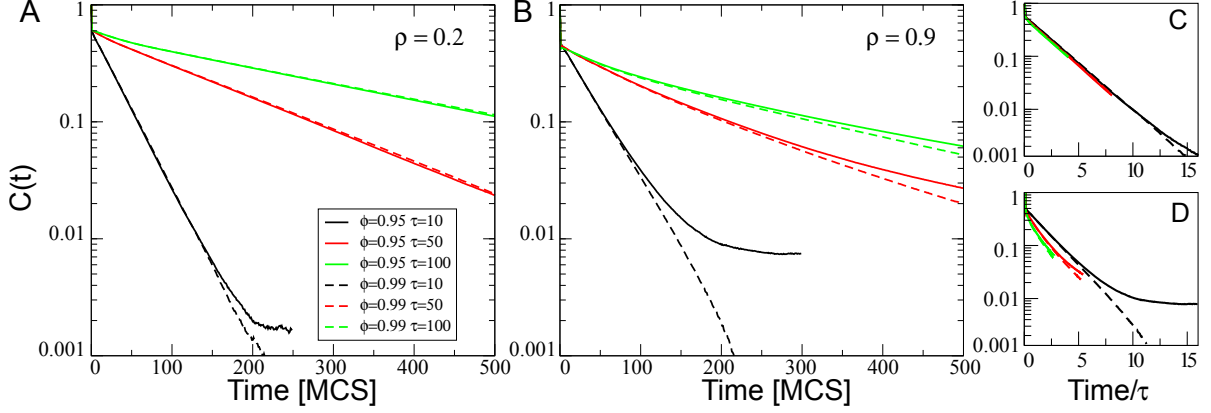

Supp. Fig. 4. Semi-log plot of  $C(t)$  as obtained by using Eq. (5) for the actualization of the angle of the driving force  $\Theta$ , and averaged over all cells in the simulation. The plots correspond to three different values of  $\tau$ , two values of  $\phi$  (0.95 solid lines and 0.99 dashed lines) and for two different densities:  $\rho = 0.2$  (A) and  $\rho = 0.9$  (B). Panels (C) and (D) show the collapse of the curves by rescaling the horizontal axes by  $\tau$ , for the simulations at low and high density, respectively.  $\Delta\Theta = \pi/3$ .

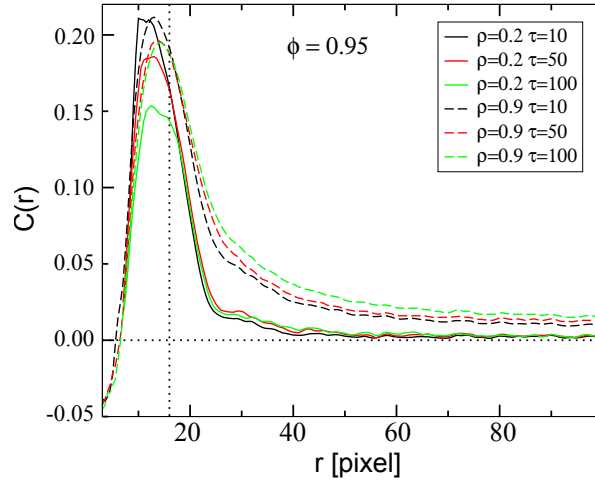

Supp. Fig. 5.  $C(r)$  as obtained by using Eq. (5) for the actualization of the angle of the driving force  $\Theta$ , for  $\rho = 0.2$  and  $0.9$  (continuous and dashed lines, respectively), and different values of  $\tau$ , as indicated. The vertical dashed line represents the average cell diameter equal to  $16 \mu m$  as discussed in Section II B. Data were obtained by averaging between 0 and 4000 MCS and over 50 and 10 samples, for  $\rho = 0.2$  and  $0.9$ , respectively. Parameters used:  $\phi = 0.95$  and  $\Delta\Theta = \pi/3$ .
